# Supplementary material for: Status of coral reefs in Antigua & Barbuda: using data to inform management
Source: PeerJ. 2020 Jun 1;8:e9236. doi: 10.7717/peerj.9236 (PMC7271886; doi:10.7717/peerj.9236)
Supplement: Supplemental Information 3 [file peerj-08-9236-s003.xlsx]

## Sheet: Key
Date	Date of survey
Latitude	Latitude (in decimal degrees)
Longitude	Longitude (in decimal degrees)
Depth	Average depth of survey (meters)
NT	Total number of transects
T	Total (all species) biomass (grams/100m2)
H	Herbivore biomass (grams/100m2)
I	Invertivore biomass (grams/100m2)
P	Piscivore biomass (grams/100m2)
CS	Commercially Significant species biomass (grams/100m2)
DP	Diadema Predator species biomass (grams/100m2)
AO	Aquarium Ornamental species biomass (grams/100m2)
ANGE	Angelfishes (all species in family) biomass (grams/100m2)
BARR	Barracudas (only Great Barracuda) biomass (grams/100m2)
BOXF	Boxfishes (all species in family) biomass (grams/100m2)
BUTT	Butterflyfishes (all species in family) biomass (grams/100m2)
CHUB	Chubs (all species in family) biomass (grams/100m2)
DAMS	Damselfishes (only Threespot and Yellowtail Damselfish) biomass (grams/100m2)
FILE	Filefishes (all species in family) biomass (grams/100m2)
GROU	Groupers (all species in family) biomass (grams/100m2)
GRUN	Grunts (all species in family) biomass (grams/100m2)
JACK	Jacks (only Bar Jack and Permit) biomass (grams/100m2)
MORA	Morays (only Goldentail, Green, and Spotted) biomass (grams/100m2)
PARR	Parrotfishes (all species in family) biomass (grams/100m2)
PORC	Porcupinefishes (only Balloonfish and Porcupinefish) biomass (grams/100m2)
PORG	Porgies (only Jolthead, Saucereye, Sheepshead and Pluma) biomass (grams/100m2)
PUFF	Porcupinefishes (only Bandtail Puffer) density (#/100m2)
SCOR	Scorpionfishes (only exotic Lionfish) biomass (grams/100m2)
SNAP	Snappers (all species in family) biomass (grams/100m2)
SURG	Surgeonfishes (all species in family) biomass (grams/100m2)
TRIG	Triggerfishes (all species in family) biomass (grams/100m2)
WRAS	Wrasse (only Hogfish, Spanish Hogfish, Slippery Dick, Yellowhead Wrasse, and Puddingwife) biomass (grams/100m2)
avg	(Average)
std	(Standard Deviation)

## Sheet: FishData_AllSites
	Code	Site	Date	Latitude	Longitude	Depth	NT	Tavg	Tstd	Havg	Hstd	Iavg	Istd	Pavg	Pstd	CSavg	CSstd	DPavg	DPstd	AOavg	AOstd	ANGEavg	ANGEstd	BARRavg	BARRstd	BOXFavg	BOXFstd	BUTTavg	BUTTstd	CHUBavg	CHUBstd	DAMSavg	DAMSstd	FILEavg	FILEstd	GROUavg	GROUstd	GRUNavg	GRUNstd	JACKavg	JACKstd	MORAavg	MORAstd	PARRavg	PARRstd	PORCavg	PORCstd	PORGavg	PORGstd
	ABNPA01	Site 01 - NDNP	2019-01-18	17.0035	-61.832	6.1	10	8768	5660	6171	5499	2010	1951	586	691	1333	1535	1096	2010	1012	2022	3	9	0	0	0	0	8	20	0	0	10	33	26	54	1198	1421	181	240	34	89	0	0	3449	4516	654	2069	0	0
	ABNPA03	Site 03 - NDNP	2019-01-18	17.0066	-61.8093	10.8	10	5050	1365	2483	905	1695	684	872	534	2043	1216	202	221	329	217	36	76	0	0	16	52	119	168	0	0	38	86	89	158	1846	1198	158	261	0	0	0	0	748	483	0	0	0	0
	ABNPA04	Site 04 - NDNP	2019-01-18	17.0072	-61.8056	9.6	10	8305	6738	3417	3874	3206	2533	1682	1082	3693	2789	541	1145	646	919	206	377	0	0	64	192	164	202	0	0	6	11	14	43	3312	2905	373	1061	0	0	183	536	1458	2100	0	0	20	65
	ABNPA05	Site 05 - NDNP	2019-01-21	17.0074	-61.7977	11.7	10	7071	3160	3270	1964	2368	947	1433	844	3254	1400	219	320	235	240	72	126	0	0	0	0	39	34	0	0	56	120	26	54	2518	1698	483	582	28	89	13	41	1210	1775	19	60	48	152
	ABNPA06	Site 06 - NDNP	2019-01-21	17.0083	-61.7935	11.9	10	7860	5539	3186	2979	3151	2429	1523	1079	3849	2880	550	557	394	431	167	310	0	0	16	52	82	121	0	0	3	7	0	0	2537	1709	605	1001	82	237	0	0	1676	2229	63	199	144	324
	ABNPA07	Site 07 - NDNP	2019-01-21	17.0046	-61.7746	5.8	10	4640	3663	2462	1673	1578	1816	601	691	1475	1581	465	932	442	966	0	0	0	0	0	0	44	60	0	0	106	158	68	116	921	1479	457	810	13	40	0	0	440	648	300	949	0	0
	ABNPA08	Site 08 - NDNP	2019-01-17	17.0017	-61.7748	9.8	10	2524	4050	1698	4144	516	426	310	303	671	660	29	63	153	163	57	120	0	0	0	0	67	122	0	0	2	5	0	0	671	660	0	0	0	0	0	0	58	79	0	0	0	0
	ABNPA09	Site 09 - NDNP	2019-01-16	17.0016	-61.7671	10.5	10	7854	3861	3183	1714	2910	1747	1762	939	4359	2470	153	309	274	266	36	114	0	0	0	0	119	145	0	0	13	40	52	90	3684	2219	379	527	28	89	0	0	1088	1157	0	0	48	152
	ABNPA10	Site 10 - NDNP	2019-01-16	17.0037	-61.7638	7.1	10	9800	9585	4871	5007	4124	6932	805	1154	3218	6632	1115	3156	1487	3078	16	50	0	0	0	0	187	221	0	0	14	40	172	545	1011	1718	2020	6230	34	109	0	0	1557	1906	991	3133	0	0
	ABNPA11	Site 11 - NDNP	2019-01-16	17.0008	-61.7615	8.6	10	14909	11320	2817	1481	6245	7572	5847	7307	6931	5240	1568	3857	1074	2570	72	93	2224	7032	16	52	22	29	0	0	13	40	254	600	3827	3944	1861	4800	97	306	69	217	1463	1374	654	2069	636	1841
	ABNPA12	Site 12 - NDNP	2019-01-21	16.9984	-61.7562	10.8	10	11017	5870	4459	2513	4022	3400	2536	2025	5559	4911	561	592	287	289	0	0	0	0	78	245	91	116	186	590	142	171	90	210	2661	3922	503	413	397	1139	0	0	2314	1390	0	0	121	383
	ABNPA13	Site 13 - NDNP	2019-01-17	17.0019	-61.7376	8.3	10	4056	1937	1705	935	1509	823	842	522	1829	1145	344	365	533	428	3	9	0	0	33	70	66	142	0	0	8	25	190	323	1370	618	110	249	69	148	0	0	210	287	0	0	48	152
	ABNPA15	Site 15 - NDNP	2019-01-17	17.006	-61.7801	11	10	7104	7668	3113	3281	1998	2372	1993	2602	3114	4318	284	472	439	582	155	269	330	1043	16	52	24	31	0	0	139	441	50	160	1420	1275	189	490	76	239	0	0	1943	2880	0	0	20	43
	ABNPA16	Site 16 - NDNP	2019-01-17	17.0017	-61.7402	9.6	10	9075	4932	4857	3688	2608	1293	1610	908	3380	1784	392	952	623	1096	0	0	0	0	16	52	201	216	352	1112	51	160	50	160	2984	1685	225	521	101	321	0	0	1986	2854	300	949	0	0
	RDAB-01	Redonda 10m (RED_05)	2018-07-17	16.9344	-62.3488	7.4	8	3659	3351	2020	1793	864	633	775	1568	645	720	96	165	364	566	0	0	412	1166	0	0	32	71	0	0	173	254	327	578	445	450	45	128	16	45	0	0	195	265	0	0	0	0
	RDAB-02	Redonda 10m (RED_07)	2018-07-16	16.943	-62.3488	10.4	8	8689	7431	3779	4459	1677	667	3233	6320	1738	1245	430	671	557	673	0	0	2479	6060	97	274	0	0	0	0	12	35	126	357	1586	1280	174	226	51	103	0	0	494	542	0	0	0	0
	RDAB-05	Redonda 10m (RED_06)	2018-07-17	16.9388	-62.3482	10.2	8	6734	8862	1346	1471	871	911	4517	9083	1309	1625	171	286	216	242	0	0	3760	9258	62	85	0	0	0	0	0	0	97	190	938	1045	80	153	370	791	0	0	616	1135	0	0	0	0
	RDAB-07	Redonda 10m site (new)	2018-07-16	16.945	-62.3481	14.1	8	7004	4546	2722	1972	2075	1375	2206	2448	2791	1950	352	542	578	803	211	598	925	1726	0	0	0	0	0	0	0	0	17	48	1853	1960	101	188	0	0	0	0	942	1206	114	322	0	0
	A01-01	Little Bird Backreef	2017-07-11	17.164	-61.7328	5	8	2348	1035	1778	1106	347	469	223	313	480	640	80	137	32	39	0	0	0	0	0	0	0	0	0	0	12	19	0	0	0	0	60	139	110	262	0	0	1361	1073	0	0	0	0
	A03-02	Kettle Bottom Shoal 4	2017-07-11	17.1811	-61.7553	8	9	2250	1692	1802	1572	280	270	168	239	333	366	90	135	82	140	0	0	0	0	0	0	0	0	0	0	0	0	0	0	0	0	36	57	0	0	0	0	1324	1149	0	0	0	0
	A03-02A	Great Bird Island West	2017-07-13	17.1468	-61.7282	5	6	695	594	486	636	149	160	59	106	127	197	64	58	84	59	0	0	0	0	0	0	15	25	0	0	3	7	0	0	0	0	12	31	47	115	0	0	430	605	0	0	0	0
	A04-02	Kettle Bottom Shoal 2	2017-07-11	17.1896	-61.7891	12	9	3571	2601	2736	1696	478	663	357	474	785	1106	41	47	51	63	0	0	0	0	0	0	7	20	0	0	4	7	0	0	0	0	18	50	0	0	0	0	2300	1348	0	0	0	0
	A05-03	Green Island 2	2017-07-12	17.0648	-61.6671	6	8	2735	3540	1240	1086	546	685	949	2549	1251	2992	114	132	201	263	3	10	0	0	0	0	0	0	0	0	6	12	126	234	0	0	178	321	878	2483	0	0	708	646	0	0	0	0
	A08-01	Great Bird Island South	2017-07-12	17.1424	-61.7243	2	4	1150	1020	1018	927	97	93	35	66	72	144	57	90	61	98	0	0	0	0	0	0	0	0	0	0	4	8	0	0	0	0	19	38	0	0	0	0	457	558	0	0	0	0
	A09-01	Windward Reef	2017-07-13	17.1203	-61.7092	6	3	4595	2098	3613	2502	522	122	461	340	815	469	85	83	179	29	0	0	0	0	0	0	20	35	0	0	239	129	0	0	0	0	0	0	0	0	0	0	1788	1497	0	0	0	0
	HG-01	Hell's Gate	2017-07-13	17.1391	-61.7209	5	10	1796	715	1588	724	149	121	58	104	116	229	86	101	78	105	0	0	0	0	0	0	2	8	0	0	52	106	0	0	0	0	10	32	6	20	0	0	1103	669	0	0	0	0
[truncated: 12 more columns]
